# Supplementary material for: Prevalence of comorbidities and impact on pulmonary rehabilitation outcomes
Source: PubMed Central journal article supplement — ERJ Open Res. 2019 Dec 8;5(4):00264-2019. doi: 10.1183/23120541.00264-2019 (PMC6899339; doi:10.1183/23120541.00264-2019), 2019-12-08
Supplement: 00264-2019.SUPPLEMENT.pdf [file 00264-2019.SUPPLEMENT.pdf]

## SUPPLEMENTARY MATERIAL

### MANUSCRIPT TITLE: Prevalence of comorbidities and impact on pulmonary rehabilitation outcomes

**Supplementary Table I: List of all individual comorbidities included under each disease category in order of prevalence in study cohort**

| Circulatory                                                                                                                                                                                                                                                                                                                                                                            | Digestive                                                                                                                                                         | Endocrine & Metabolic                                                                                                                                                                 |
|----------------------------------------------------------------------------------------------------------------------------------------------------------------------------------------------------------------------------------------------------------------------------------------------------------------------------------------------------------------------------------------|-------------------------------------------------------------------------------------------------------------------------------------------------------------------|---------------------------------------------------------------------------------------------------------------------------------------------------------------------------------------|
| <b>Hypertension (48.4%)</b><br><b>Coronary artery disease (14.3%)</b><br><b>Atrial fibrillation (11.7%)</b><br><b>Heart failure (8.2%)</b><br>Stroke (4.9%)<br>Cardiomyopathy (2.5%)<br>Transient ischemic attack (2.3%)<br>Peripheral artery disease (2.0%)<br>Peripheral vascular disease (1.8%)<br>Arrhythmia (1.0%)<br>Mitral valve insufficiency (1.0%)<br>Atherosclerosis (0.2%) | <b>GERD (42.4%)</b><br>Inflammatory bowel disease (2.7%)<br>Hepatitis (1.8%)                                                                                      | <b>Dyslipidemia (26.0%)</b><br><b>Type II diabetes (14.8%)</b><br><b>Hypothyroidism (12.5%)</b><br><b>Obesity (10.0%)</b><br><b>Hyperthyroidism (12.5%)</b><br>Type I diabetes (0.4%) |
| Mental & Behavioural                                                                                                                                                                                                                                                                                                                                                                   | Musculoskeletal & Connective Tissue                                                                                                                               | Nervous System                                                                                                                                                                        |
| <b>Anxiety (29.5%)</b><br><b>Depression (27.5%)</b><br>Bipolar (1.4%)<br>Post-traumatic stress disorder (0.8%)<br>Traumatic brain injury (post-concussion syndrome) (0.4%)<br>Schizophrenia (0.2%)<br>Substance abuse (0.2%)                                                                                                                                                           | <b>Osteoarthritis (21.5%)</b><br><b>Osteoporosis (17.2%)</b><br><b>Gout (5.7%)</b><br>Fibromyalgia (4.7%)<br>Rheumatoid arthritis (1.8%)                          | Neuropathy (4.1%)<br>Migraine (1.6%)<br>Alzheimer's Disease (0.4%)<br>Parkinson's Disease (0.4%)<br>Multiple sclerosis (0.4%)                                                         |
| Malignant Neoplasms                                                                                                                                                                                                                                                                                                                                                                    |                                                                                                                                                                   |                                                                                                                                                                                       |
| Respiratory & Intrathoracic Organs ( <b>Lung-7.4%</b> )<br>Breast (6.3%)<br>Male Genital Organs (Prostate - 5.1%, Testicular-0.4%)                                                                                                                                                                                                                                                     | Female Genital Organs (Cervical-2.4%, Ovary-0.4%)<br>Urinary Tract (Bladder-2.0%, Kidney-0.4%)<br>Digestive Organs (Colorectal-1.6%, Esophageal-0.6%, Liver-0.2%) | Lymphoid, Hematopoietic & Related Tissue (Leukemia-1.2%, Lymphoma-0.8%)<br>Thyroid and Other Endocrine Glands (Thyroid-0.4%)<br>Bone and Articular Cartilage (Bone-0.2%)              |

Note: The only disease of the blood in the study population was Anaemia (8.6%), conditions in bold are those with a prevalence > 5.0%

**Supplementary Table II: Prevalence of comorbidities in COPD and ILD populations by sex**

|                               | COPD (n=340) |                |              | ILD (n=66) |                |              |
|-------------------------------|--------------|----------------|--------------|------------|----------------|--------------|
|                               | Total        | F<br>(n=174)   | M<br>(n=166) | Total      | F<br>(n=31)    | M<br>(n=35)  |
| <b>Circulatory</b>            | 65.6         | 60.9           | 70.5         | 53.0       | 51.6           | 54.3         |
| Hypertension                  | 49.1         | 44.3           | 54.2         | 42.4       | 48.4           | 37.1         |
| CAD                           | 15.3         | 12.6           | 18.1         | 13.6       | 6.5            | 20.0         |
| Atrial Fibrillation           | 11.5         | 8.6            | 14.5         | 6.1        | 6.5            | 5.7          |
| Heart Failure                 | 7.4          | 8.0            | 6.6          | 1.5        | 0              | 2.9          |
| <b>Endocrine/ Metabolic</b>   | 46.8         | 47.1           | 46.4         | 51.5       | 58.1           | 45.7         |
| Dyslipidemia                  | 27.9         | 25.9           | 30.1         | 19.7       | 19.4           | 20.0         |
| Type II Diabetes              | 11.5         | 10.9           | 12.0         | 21.2       | 16.1           | 25.7         |
| Hypothyroidism                | 12.4         | <b>19.0***</b> | 5.4          | 15.2       | <b>29.0**</b>  | 2.9          |
| Obesity                       | 9.4          | 12.1           | 6.6          | 13.6       | 12.9           | 14.3         |
| <b>Digestive System</b>       | 44.1         | <b>50.6*</b>   | 37.3         | 54.5       | 61.3           | 48.6         |
| GERD                          | 41.2         | <b>48.3**</b>  | 33.7         | 51.5       | 54.8           | 48.6         |
| <b>MSK/ connective tissue</b> | 41.2         | <b>48.9**</b>  | 33.1         | 39.4       | <b>54.8*</b>   | 25.7         |
| Osteoarthritis                | 22.1         | <b>28.7**</b>  | 15.1         | 15.2       | <b>29.0**</b>  | 2.9          |
| Osteoporosis                  | 18.8         | <b>27.0***</b> | 10.2         | 15.2       | <b>22.6*</b>   | 8.6          |
| Gout                          | 5.3          | 3.4            | 7.2          | 7.6        | 0              | <b>14.3*</b> |
| <b>Mental / Behavioural</b>   | 40.0         | <b>52.3***</b> | 27.1         | 43.9       | <b>71.0***</b> | 20.0         |
| Anxiety                       | 28.8         | <b>36.8**</b>  | 20.5         | 33.3       | <b>51.6*</b>   | 17.1         |
| Depression                    | 27.1         | <b>36.2***</b> | 17.5         | 28.8       | <b>45.2**</b>  | 14.3         |
| <b>Malignant Neoplasms</b>    | 19.7         | <b>24.7*</b>   | 14.5         | 10.6       | 16.1           | 5.7          |
| Lung cancer                   | 7.1          | 8.6            | 5.4          | 4.5        | 6.5            | 2.9          |
| <b>Nervous System</b>         | 10.3         | 13.2           | 7.2          | 9.1        | 6.5            | 11.4         |
| <b>Blood (anaemia)</b>        | 7.9          | 9.2            | 6.6          | 6.1        | 3.2            | 8.6          |

Bold headings refer to categories, only individual comorbidities with prevalence > 5.0% are depicted.

CAD= coronary artery disease, GERD=gastroesophageal reflux disease, Full comorbidity list is provided in supplementary Table I (\* p < 0.05, \*\* p < 0.01, \*\*\* p < 0.001).

**Supplementary Table III: Impact of demographics on achieving minimal important difference in health-related quality of life (HRQoL) in COPD and ILD subpopulations**

|                          |        | <b>HRQoL (+ 0.5 units)</b>                      |                                                 |                                                 |                                                 |
|--------------------------|--------|-------------------------------------------------|-------------------------------------------------|-------------------------------------------------|-------------------------------------------------|
| <b>COPD</b>              |        | <b>CRQ-Dyspnea<br/>% responders<br/>(n=208)</b> | <b>CRQ-Fatigue<br/>% responders<br/>(n=208)</b> | <b>CRQ-Emotion<br/>% responders<br/>(n=207)</b> | <b>CRQ-Mastery<br/>% responders<br/>(n=207)</b> |
| <b>Age group</b>         | < 65   | 67.3                                            | 78.2                                            | <b>70.9*</b>                                    | <b>81.8*</b>                                    |
|                          | ≥ 65   | 58.2                                            | 72.5                                            | <b>55.3</b>                                     | <b>67.1</b>                                     |
| <b>mMRC</b>              | 0 or 1 | <b>22.2*</b>                                    | 55.6                                            | 44.4                                            | 55.5                                            |
|                          | 2      | <b>55.9</b>                                     | 82.4                                            | 47.1                                            | 76.5                                            |
|                          | 3      | <b>69.2</b>                                     | 76.9                                            | 67.7                                            | 72.3                                            |
|                          | 4      | <b>62.7</b>                                     | 74.6                                            | 59.3                                            | 74.6                                            |
| <b>Sex</b>               | F      | <b>67.3*</b>                                    | <b>82.7**</b>                                   | <b>67.3*</b>                                    | <b>80.0**</b>                                   |
|                          | M      | <b>53.1</b>                                     | <b>64.3</b>                                     | <b>50.5</b>                                     | <b>60.8</b>                                     |
| <b>O<sub>2</sub> use</b> | Y      | 56.3                                            | <b>81.6*</b>                                    | 62.1                                            | 73.8                                            |
|                          | N      | 64.8                                            | <b>66.7</b>                                     | 56.7                                            | 68.3                                            |
| <b>ILD</b>               |        | <b>CRQ-Dyspnea<br/>% responders<br/>(n=36)</b>  | <b>CRQ-Fatigue<br/>% responders<br/>(n=38)</b>  | <b>CRQ-Emotion<br/>% responders<br/>(n=38)</b>  | <b>CRQ-Mastery<br/>% responders<br/>(n=38)</b>  |
| <b>Age group</b>         | < 65   | 70.6                                            | 70.6                                            | 70.6                                            | 70.6                                            |
|                          | ≥ 65   | 52.6                                            | 57.1                                            | 57.1                                            | 71.4                                            |
| <b>mMRC</b>              | 0 or 1 | 50.0                                            | 75.0                                            | <b>50.0*</b>                                    | 25.0                                            |
|                          | 2      | 100.0                                           | 100.0                                           | <b>100.0</b>                                    | 100.0                                           |
|                          | 3      | 69.2                                            | 71.4                                            | <b>85.7</b>                                     | 78.6                                            |
|                          | 4      | 58.3                                            | 46.2                                            | <b>38.5</b>                                     | 53.8                                            |
| <b>Sex</b>               | F      | 75.0                                            | <b>82.4*</b>                                    | 76.5                                            | 82.4                                            |
|                          | M      | 50.0                                            | <b>47.6</b>                                     | 52.4                                            | 61.9                                            |
| <b>O<sub>2</sub> use</b> | Y      | <b>28.6*</b>                                    | 42.9                                            | 37.5                                            | 62.5                                            |
|                          | N      | <b>69.0</b>                                     | 60.0                                            | 70.0                                            | 73.3                                            |

mMRC score of 0 and 1 combined as only 1 patient in COPD population had mMRC of 0

(\*p < 0.05, \*\* p < 0.01, \*\*\* p < 0.001) HRQoL= health-related quality of life, mMRC=Modified Medical Research Council Dyspnea Scale
